# Supplementary material for: Head and Neck Squamous Cell Carcinoma Subtypes Based on Immunologic and Hallmark Gene Sets in Tumor and Non-tumor Tissues
Source: Front Surg. 2022 Feb 3;9:821600. doi: 10.3389/fsurg.2022.821600 (PMC8850349; doi:10.3389/fsurg.2022.821600)
Supplement: Supplementary Table 4 — The details of GO enrichment analysis and KEGG pathway analysis based on the genes from T gene sets. [file Table_4.XLSX]

## Sheet: Sheet1
Tumor
ONTOLOGY	ID	Description	GeneRatio	BgRatio	pvalue	p.adjust	qvalue	geneID	Count
BP	GO:0034976	response to endoplasmic reticulum stress	21/331	294/18866	6.02617e-08	0.000203142	0.000195946	PDIA4/MYDGF/HSP90B1/CAV1/SDF2L1/RACK1/PDIA5/MANF/PDIA6/CREB3/PREB/UBXN8/KLHDC3/HYOU1/HM13/SELENOS/SEC61B/CTDSP2/DERL3/WIPI1/FBXO6	21
BP	GO:0030968	endoplasmic reticulum unfolded protein response	13/331	125/18866	3.0967e-07	0.000521949	0.000503458	MYDGF/HSP90B1/RACK1/PDIA5/PDIA6/CREB3/PREB/KLHDC3/HYOU1/SELENOS/CTDSP2/DERL3/WIPI1	13
BP	GO:0035966	response to topologically incorrect protein	16/331	205/18866	7.1782e-07	0.000726032	0.000700312	MYDGF/HSP90B1/SDF2L1/RACK1/PDIA5/MANF/PDIA6/CREB3/PREB/KLHDC3/HYOU1/SELENOS/CTDSP2/DERL3/WIPI1/FBXO6	16
BP	GO:0006986	response to unfolded protein	15/331	183/18866	8.61503e-07	0.000726032	0.000700312	MYDGF/HSP90B1/RACK1/PDIA5/MANF/PDIA6/CREB3/PREB/KLHDC3/HYOU1/SELENOS/CTDSP2/DERL3/WIPI1/FBXO6	15
BP	GO:0035967	cellular response to topologically incorrect protein	14/331	166/18866	1.42396e-06	0.000960035	0.000926025	MYDGF/HSP90B1/SDF2L1/RACK1/PDIA5/PDIA6/CREB3/PREB/KLHDC3/HYOU1/SELENOS/CTDSP2/DERL3/WIPI1	14
BP	GO:0034620	cellular response to unfolded protein	13/331	146/18866	1.84511e-06	0.00103665	0.000999921	MYDGF/HSP90B1/RACK1/PDIA5/PDIA6/CREB3/PREB/KLHDC3/HYOU1/SELENOS/CTDSP2/DERL3/WIPI1	13
BP	GO:0006487	protein N-linked glycosylation	9/331	73/18866	5.11442e-06	0.00246296	0.00237571	OSTC/STT3A/DDOST/ALG6/ALG14/ST6GAL1/DERL3/B4GALT1/RFT1	9
BP	GO:0036498	IRE1-mediated unfolded protein response	8/331	67/18866	2.18723e-05	0.00921643	0.00888993	MYDGF/PDIA5/PDIA6/PREB/KLHDC3/HYOU1/CTDSP2/WIPI1	8
BP	GO:0036503	ERAD pathway	9/331	100/18866	6.62356e-05	0.0248089	0.02393	HSP90B1/CAV1/SDF2L1/UBXN8/HM13/SELENOS/SEC61B/DERL3/FBXO6	9
BP	GO:0046174	polyol catabolic process	5/331	26/18866	7.83561e-05	0.0264138	0.0254781	GK/GPD2/IMPA2/SYNJ2/BPNT1	5
BP	GO:0031167	rRNA methylation	5/331	28/18866	0.000113749	0.0348589	0.033624	NSUN5P1/NSUN5P2/NSUN5/TFB1M/METTL5	5
BP	GO:0030970	retrograde protein transport, ER to cytosol	5/331	29/18866	0.000135485	0.0351322	0.0338876	HSP90B1/HM13/SELENOS/SEC61B/DERL3	5
BP	GO:1903513	endoplasmic reticulum to cytosol transport	5/331	29/18866	0.000135485	0.0351322	0.0338876	HSP90B1/HM13/SELENOS/SEC61B/DERL3	5
BP	GO:0018279	protein N-linked glycosylation via asparagine	5/331	30/18866	0.000160262	0.0385887	0.0372216	OSTC/STT3A/DDOST/ST6GAL1/DERL3	5
BP	GO:0018196	peptidyl-asparagine modification	5/331	31/18866	0.000188356	0.0423298	0.0408302	OSTC/STT3A/DDOST/ST6GAL1/DERL3	5
BP	GO:0032527	protein exit from endoplasmic reticulum	6/331	49/18866	0.000206452	0.0434969	0.041956	HSP90B1/PREB/HM13/SELENOS/SEC61B/DERL3	6
CC	GO:0034663	endoplasmic reticulum chaperone complex	6/350	10/19559	6.21992e-09	2.61859e-06	2.39631e-06	HSP90B1/MZB1/SDF2L1/PDIA6/PPIB/HYOU1	6
CC	GO:1990204	oxidoreductase complex	10/350	110/19559	2.8462e-05	0.00599124	0.00548267	RRM2/NDUFB4/UQCRQ/GPD2/GLDC/UQCR10/NDUFB10/NDUFAB1/BCKDK/NDUFS2	10
CC	GO:0030176	integral component of endoplasmic reticulum membrane	11/350	158/19559	0.00013324	0.0186981	0.0171109	SPCS1/SEC61A1/PREB/UBXN8/PIGU/HM13/SELENOS/TRAM2/DERL3/DHCR7/SGMS1	11
CC	GO:0031227	intrinsic component of endoplasmic reticulum membrane	11/350	166/19559	0.000205724	0.0216525	0.0198145	SPCS1/SEC61A1/PREB/UBXN8/PIGU/HM13/SELENOS/TRAM2/DERL3/DHCR7/SGMS1	11
CC	GO:0005788	endoplasmic reticulum lumen	15/350	308/19559	0.000467831	0.0366662	0.0335538	PDIA4/MYDGF/HSP90B1/MZB1/SDF2L1/PDIA5/MANF/MEN1/PDIA6/PPIB/HYOU1/QSOX1/LAMC1/ARSG/DBI	15
CC	GO:0005793	endoplasmic reticulum-Golgi intermediate compartment	9/350	130/19559	0.000560019	0.0366662	0.0335538	MYDGF/TRAPPC12/LMAN2/PDIA6/MAN1A1/LMAN2L/TICAM2/RGMB/STX5	9
CC	GO:0098687	chromosomal region	16/350	350/19559	0.000609652	0.0366662	0.0335538	ZWINT/MCM7/DDB1/MCM3/MEN1/TRAPPC12/BLM/OIP5/NSMCE4A/MIS18A/MAD2L1/DNMT1/CDCA5/RAD21/CLIP1/SPO11	16
CC	GO:0017101	aminoacyl-tRNA synthetase multienzyme complex	3/350	11/19559	0.000842516	0.0443374	0.0405738	DARS1/IARS1/MARS1	3
MF	GO:0003756	protein disulfide isomerase activity	5/338	19/18352	1.93454e-05	0.00509997	0.00488281	PDIA4/PDIA5/PDIA6/CRELD2/QSOX1	5
MF	GO:0016864	intramolecular oxidoreductase activity, transposing S-S bonds	5/338	19/18352	1.93454e-05	0.00509997	0.00488281	PDIA4/PDIA5/PDIA6/CRELD2/QSOX1	5
MF	GO:0016853	isomerase activity	12/338	156/18352	3.2899e-05	0.00509997	0.00488281	PDIA4/PDIA5/PDIA6/FKBP2/PPIB/MRI1/ECH1/CRELD2/GALM/QSOX1/PPIL1/SPO11	12
MF	GO:0016860	intramolecular oxidoreductase activity	7/338	50/18352	3.41707e-05	0.00509997	0.00488281	PDIA4/PDIA5/PDIA6/MRI1/ECH1/CRELD2/QSOX1	7
Tumor
ID	Description	GeneRatio	BgRatio	pvalue	p.adjust	qvalue	geneID	Count
hsa04141	Protein processing in endoplasmic reticulum	16/177	171/8101	8.89393e-07	0.000192998	0.000190985	PDIA4/HSP90B1/SEC61A1/STT3A/LMAN2/PDIA6/DDOST/PREB/UBXN8/HYOU1/SSR3/MAN1A1/SELENOS/SEC61B/DERL3/FBXO6	16
hsa00510	N-Glycan biosynthesis	7/177	50/8101	9.54109e-05	0.00832028	0.00823351	STT3A/DDOST/ALG6/ALG14/MAN1A1/ST6GAL1/B4GALT1	7
hsa03060	Protein export	5/177	23/8101	0.000115027	0.00832028	0.00823351	SPCS1/SEC61A1/SEC11C/SRP54/SEC61B	5
hsa00513	Various types of N-glycan biosynthesis	5/177	39/8101	0.00148367	0.0804893	0.0796499	STT3A/DDOST/ALG14/MAN1A1/B4GALT1	5
hsa04146	Peroxisome	6/177	82/8101	0.00888386	0.377318	0.373383	GNPAT/PRDX1/ECH1/IDH2/MPV17/PHYH	6
hsa00561	Glycerolipid metabolism	5/177	61/8101	0.0104328	0.377318	0.373383	PLPP5/GK/DGKI/LPIN1/DGKZ	5
hsa00970	Aminoacyl-tRNA biosynthesis	5/177	66/8101	0.0143688	0.445432	0.440786	DARS1/IARS1/QRSL1/MARS1/AARS1	5
hsa00564	Glycerophospholipid metabolism	6/177	98/8101	0.0201062	0.545381	0.539693	PLPP5/GNPAT/GPD2/DGKI/LPIN1/DGKZ	6
hsa05110	Vibrio cholerae infection	4/177	50/8101	0.0232451	0.560466	0.554621	PDIA4/SEC61A1/KDELR2/SEC61B	4
hsa00190	Oxidative phosphorylation	7/177	134/8101	0.0272667	0.591687	0.585516	NDUFB4/UQCRQ/ATP5PF/UQCR10/NDUFB10/NDUFAB1/NDUFS2	7
hsa05415	Diabetic cardiomyopathy	9/177	203/8101	0.033691	0.663689	0.656768	NDUFB4/UQCRQ/ATP5PF/UQCR10/NDUFB10/NDUFAB1/SMAD3/TBC1D4/NDUFS2	9
hsa05020	Prion disease	11/177	273/8101	0.0367017	0.663689	0.656768	CAV1/NDUFB4/UQCRQ/ATP5PF/CREB3/UQCR10/NDUFB10/NDUFAB1/LAMC1/NDUFS2/CSNK2B	11
hsa03030	DNA replication	3/177	36/8101	0.0432349	0.72169	0.714163	MCM7/MCM3/RPA3	3
