# Supplementary material for: Head and Neck Squamous Cell Carcinoma Subtypes Based on Immunologic and Hallmark Gene Sets in Tumor and Non-tumor Tissues
Source: Frontiers journal article supplement (doi:10.3389/fsurg.2022.821600), 2022-02-03
Supplement: Table_1.DOCX [file Table_1.DOCX]

| Covariates | Cluster | Total | C1 | C2 | C3 | Pvalue |
| --- | --- | --- | --- | --- | --- | --- |
| fustat | Alive | 280(56.34%) | 68(67.33%) | 153(57.95%) | 59(44.7%) | 0.0019 |
| fustat | Dead | 217(43.66%) | 33(32.67%) | 111(42.05%) | 73(55.3%) |  |
| Age | <=65 | 323(64.99%) | 69(68.32%) | 164(62.12%) | 90(68.18%) | 0.3611 |
| Age | >65 | 174(35.01%) | 32(31.68%) | 100(37.88%) | 42(31.82%) |  |
| Gender | FEMALE | 133(26.76%) | 26(25.74%) | 81(30.68%) | 26(19.7%) | 0.0644 |
| Gender | MALE | 364(73.24%) | 75(74.26%) | 183(69.32%) | 106(80.3%) |  |
| Grade | G1 | 61(12.27%) | 9(8.91%) | 40(15.15%) | 12(9.09%) | 0.0186 |
| Grade | G2 | 297(59.76%) | 49(48.51%) | 166(62.88%) | 82(62.12%) |  |
| Grade | G3 | 118(23.74%) | 35(34.65%) | 51(19.32%) | 32(24.24%) |  |
| Grade | G4 | 2(0.4%) | 1(0.99%) | 1(0.38%) | 0(0%) |  |
| Grade | unknow | 19(3.82%) | 7(6.93%) | 6(2.27%) | 6(4.55%) |  |
| Stage | Stage I | 25(5.03%) | 9(8.91%) | 13(4.92%) | 3(2.27%) | 0.0618 |
| Stage | Stage II | 69(13.88%) | 15(14.85%) | 39(14.77%) | 15(11.36%) |  |
| Stage | Stage III | 78(15.69%) | 10(9.9%) | 46(17.42%) | 22(16.67%) |  |
| Stage | Stage IV | 258(51.91%) | 40(39.6%) | 137(51.89%) | 81(61.36%) |  |
| Stage | unknow | 67(13.48%) | 27(26.73%) | 29(10.98%) | 11(8.33%) |  |
| T | T1 | 45(9.05%) | 17(16.83%) | 24(9.09%) | 4(3.03%) | 1.00E-04 |
| T | T2 | 131(26.36%) | 30(29.7%) | 69(26.14%) | 32(24.24%) |  |
| T | T3 | 96(19.32%) | 11(10.89%) | 58(21.97%) | 27(20.45%) |  |
| T | T4 | 170(34.21%) | 22(21.78%) | 87(32.95%) | 61(46.21%) |  |
| T | unknow | 55(11.07%) | 21(20.79%) | 26(9.85%) | 8(6.06%) |  |
| M | M0 | 183(36.82%) | 44(43.56%) | 99(37.5%) | 40(30.3%) | 0.6555 |
| M | M1 | 1(0.2%) | 0(0%) | 1(0.38%) | 0(0%) |  |
| M | unknow | 313(62.98%) | 57(56.44%) | 164(62.12%) | 92(69.7%) |  |
| N | N0 | 168(33.8%) | 32(31.68%) | 92(34.85%) | 44(33.33%) | 0.4515 |
| N | N1 | 65(13.08%) | 10(9.9%) | 38(14.39%) | 17(12.88%) |  |
| N | N2 | 164(33%) | 29(28.71%) | 82(31.06%) | 53(40.15%) |  |
| N | N3 | 7(1.41%) | 1(0.99%) | 6(2.27%) | 0(0%) |  |
| N | unknow | 93(18.71%) | 29(28.71%) | 46(17.42%) | 18(13.64%) |  |
